# Supplementary material for: FOXN3 and GDNF Polymorphisms as Common Genetic Factors of Substance Use and Addictive Behaviors
Source: MDPI journal article supplement (doi:10.3390/jpm12050690), 2022-04-26
Supplement: s1 [file s1]

**Table S1 Genotype distribution of the analyzed 32 SNPs**

| Gene  | dbSNP number | Genotype | N    | Observed frequency | Expected frequency <sup>1</sup> | HWE <sup>2</sup> p | Call rate |
|-------|--------------|----------|------|--------------------|---------------------------------|--------------------|-----------|
| FOXN3 | rs759364     | AA       | 324  | 11%                | 9%                              | <0.001             | 96.94%    |
|       |              | AG       | 1066 | 37%                | 41%                             |                    |           |
|       |              | GG       | 1521 | 52%                | 50%                             |                    |           |
| GDNF  | rs3096140    | AA       | 1327 | 51%                | 50%                             | 0.589              | 87.35%    |
|       |              | AG       | 1062 | 40%                | 41%                             |                    |           |
|       |              | GG       | 234  | 9%                 | 9%                              |                    |           |
| GDNF  | rs1549250    | AA       | 965  | 33%                | 34%                             | 0.314              | 96.90%    |
|       |              | AC       | 1456 | 50%                | 49%                             |                    |           |
|       |              | CC       | 489  | 17%                | 17%                             |                    |           |
| GDNF  | rs2910702    | CC       | 162  | 6%                 | 6%                              | 0.977              | 97.30%    |
|       |              | CT       | 1061 | 36%                | 36%                             |                    |           |
|       |              | TT       | 1699 | 58%                | 58%                             |                    |           |
| GDNF  | rs11111      | CC       | 66   | 2%                 | 2%                              | 0.658              | 97.74%    |
|       |              | CT       | 791  | 27%                | 27%                             |                    |           |
|       |              | TT       | 2078 | 71%                | 71%                             |                    |           |
| GDNF  | rs2973033    | CC       | 225  | 8%                 | 8%                              | 0.854              | 96.64%    |
|       |              | CT       | 1188 | 41%                | 41%                             |                    |           |
|       |              | TT       | 1489 | 51%                | 51%                             |                    |           |
| GDNF  | rs3812047    | CC       | 2105 | 76%                | 76%                             | 0.602              | 92.01%    |
|       |              | CT       | 620  | 23%                | 22%                             |                    |           |
|       |              | TT       | 38   | 1%                 | 2%                              |                    |           |
| GDNF  | rs1981844    | CC       | 218  | 8%                 | 8%                              | 0.737              | 91.11%    |
|       |              | CG       | 1138 | 42%                | 41%                             |                    |           |
|       |              | GG       | 1380 | 50%                | 51%                             |                    |           |
| CNR1  | rs806380     | AA       | 1327 | 45%                | 45%                             | 0.827              | 98.43%    |
|       |              | AG       | 1296 | 44%                | 44%                             |                    |           |
|       |              | GG       | 333  | 11%                | 11%                             |                    |           |
| CNR1  | rs2023239    | CC       | 59   | 2%                 | 3%                              | <0.001             | 97.44%    |
|       |              | CT       | 909  | 31%                | 29%                             |                    |           |
|       |              | TT       | 1958 | 67%                | 68%                             |                    |           |
| DRD1  | rs4532       | CC       | 402  | 14%                | 14%                             | 0.346              | 98.17%    |
|       |              | CT       | 1423 | 48%                | 47%                             |                    |           |
|       |              | TT       | 1123 | 38%                | 39%                             |                    |           |
| DRD2  | rs6277       | AA       | 823  | 28%                | 28%                             | 0.932              | 98.30%    |
|       |              | AG       | 1481 | 50%                | 50%                             |                    |           |
|       |              | GG       | 648  | 22%                | 22%                             |                    |           |
| ANKK1 | rs1800497    | AA       | 103  | 4%                 | 4%                              | 0.749              | 98.70%    |
|       |              | AG       | 933  | 31%                | 31%                             |                    |           |
|       |              | GG       | 1928 | 65%                | 65%                             |                    |           |

|           |            |    |      |     |     |              |        |
|-----------|------------|----|------|-----|-----|--------------|--------|
| DRD3      | rs6280     | CC | 286  | 10% | 9%  | 0.821        | 97.30% |
|           |            | CT | 1233 | 42% | 43% |              |        |
|           |            | TT | 1403 | 48% | 48% |              |        |
| DRD4      | rs1800955  | CC | 591  | 21% | 21% | 0.901        | 92.24% |
|           |            | CT | 1364 | 49% | 50% |              |        |
|           |            | TT | 815  | 30% | 29% |              |        |
| CHRNA5/A3 | rs16969968 | AA | 351  | 12% | 12% | 0.996        | 95.14% |
|           |            | AG | 1304 | 46% | 46% |              |        |
|           |            | GG | 1202 | 42% | 42% |              |        |
| CHRNA5/A3 | rs1051730  | AA | 403  | 14% | 13% | <b>0.004</b> | 95.70% |
|           |            | AG | 1235 | 43% | 46% |              |        |
|           |            | GG | 1236 | 43% | 41% |              |        |
| CHRNA3    | rs6474412  | CC | 154  | 5%  | 5%  | 0.967        | 96.74% |
|           |            | CT | 1019 | 35% | 35% |              |        |
|           |            | TT | 1732 | 60% | 60% |              |        |
| OPRM1     | rs1799971  | AA | 2277 | 77% | 77% | 0.672        | 98.63% |
|           |            | AG | 634  | 21% | 21% |              |        |
|           |            | GG | 51   | 2%  | 2%  |              |        |
| GABRA2    | rs279858   | CC | 480  | 16% | 16% | 0.892        | 99.03% |
|           |            | CT | 1414 | 48% | 48% |              |        |
|           |            | TT | 1080 | 36% | 36% |              |        |
| TAS2R16   | rs978739   | CC | 324  | 11% | 12% | 0.126        | 98.50% |
|           |            | CT | 1384 | 47% | 45% |              |        |
|           |            | TT | 1250 | 42% | 43% |              |        |
| FKBP5     | rs1360780  | CC | 1487 | 52% | 52% | 0.322        | 94.64% |
|           |            | CT | 1115 | 39% | 40% |              |        |
|           |            | TT | 240  | 9%  | 8%  |              |        |
| FKBP5     | rs4713916  | AA | 227  | 8%  | 7%  | 0.592        | 97.67% |
|           |            | AG | 1138 | 39% | 40% |              |        |
|           |            | GG | 1568 | 53% | 53% |              |        |
| ALDH2     | rs886205   | AA | 1994 | 68% | 68% | 0.891        | 98.10% |
|           |            | AG | 864  | 29% | 29% |              |        |
|           |            | GG | 88   | 3%  | 3%  |              |        |
| ALDH1B1   | rs2073478  | GG | 422  | 15% | 15% | 0.839        | 94.04% |
|           |            | GT | 1320 | 47% | 47% |              |        |
|           |            | TT | 1082 | 38% | 38% |              |        |
| ADH1C     | rs698      | CC | 401  | 14% | 15% | 0.555        | 93.51% |
|           |            | CT | 1356 | 48% | 47% |              |        |
|           |            | TT | 1051 | 38% | 38% |              |        |
| ADH1C     | rs1693482  | CC | 1087 | 37% | 38% | 0.727        | 96.70% |
|           |            | CT | 1396 | 48% | 47% |              |        |
|           |            | TT | 421  | 14% | 15% |              |        |
| FAAH      | rs324420   | AA | 132  | 5%  | 5%  | 0.796        | 95.04% |

|       |           |    |      |     |     |       |        |
|-------|-----------|----|------|-----|-----|-------|--------|
|       |           | AC | 992  | 35% | 34% |       |        |
|       |           | CC | 1730 | 60% | 60% |       |        |
| COMT  | rs4680    | AA | 787  | 27% | 28% | 0.718 | 96.17% |
|       |           | AG | 1462 | 51% | 50% |       |        |
|       |           | GG | 639  | 22% | 22% |       |        |
|       |           |    |      |     |     |       |        |
| WFS1  | rs1046322 | AA | 26   | 1%  | 1%  | 0.559 | 98.57% |
|       |           | AG | 558  | 19% | 19% |       |        |
|       |           | GG | 2376 | 80% | 80% |       |        |
| WFS1  | rs9457    | CC | 980  | 33% | 33% | 0.585 | 98.43% |
|       |           | CG | 1420 | 48% | 49% |       |        |
|       |           | GG | 556  | 19% | 18% |       |        |
| CALD1 | rs3800737 | CC | 290  | 10% | 9%  | 0.741 | 98.24% |
|       |           | CT | 1241 | 42% | 43% |       |        |
|       |           | TT | 1419 | 48% | 48% |       |        |

Notes. <sup>1</sup>Expected frequency based on the Hardy-Weinberg equilibrium; <sup>2</sup>Hardy-Weinberg equilibrium
